# Supplementary material for: Stratification of follicular thyroid tumours using data‐independent acquisition proteomics and a comprehensive thyroid tissue spectral library
Source: PubMed Central journal article supplement (PMC9019893; doi:10.1002/1878-0261.13198), 2022-03-12

**A**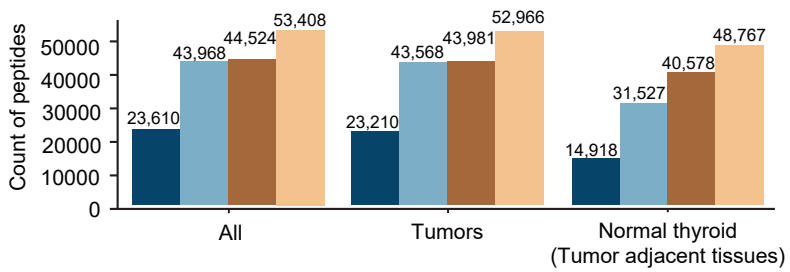**B**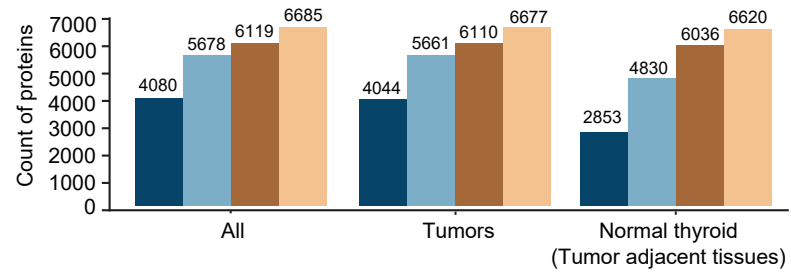

Supplement: MOL2-16-1611-s004.pdf [file MOL2-16-1611-s004.pdf]
